# Supplementary material for: Expression and function of nuclear receptor coactivator 4 isoforms in transformed endometriotic and malignant ovarian cells
Source: PubMed Central journal article supplement (PMC5797054; doi:10.18632/oncotarget.23747), 2017-12-28
Supplement: oncotarget-09-5344-s001.pdf [file oncotarget-09-5344-s001.pdf]

# Expression and function of nuclear receptor coactivator 4 isoforms in transformed endometriotic and malignant ovarian cells

## SUPPLEMENTARY MATERIALS

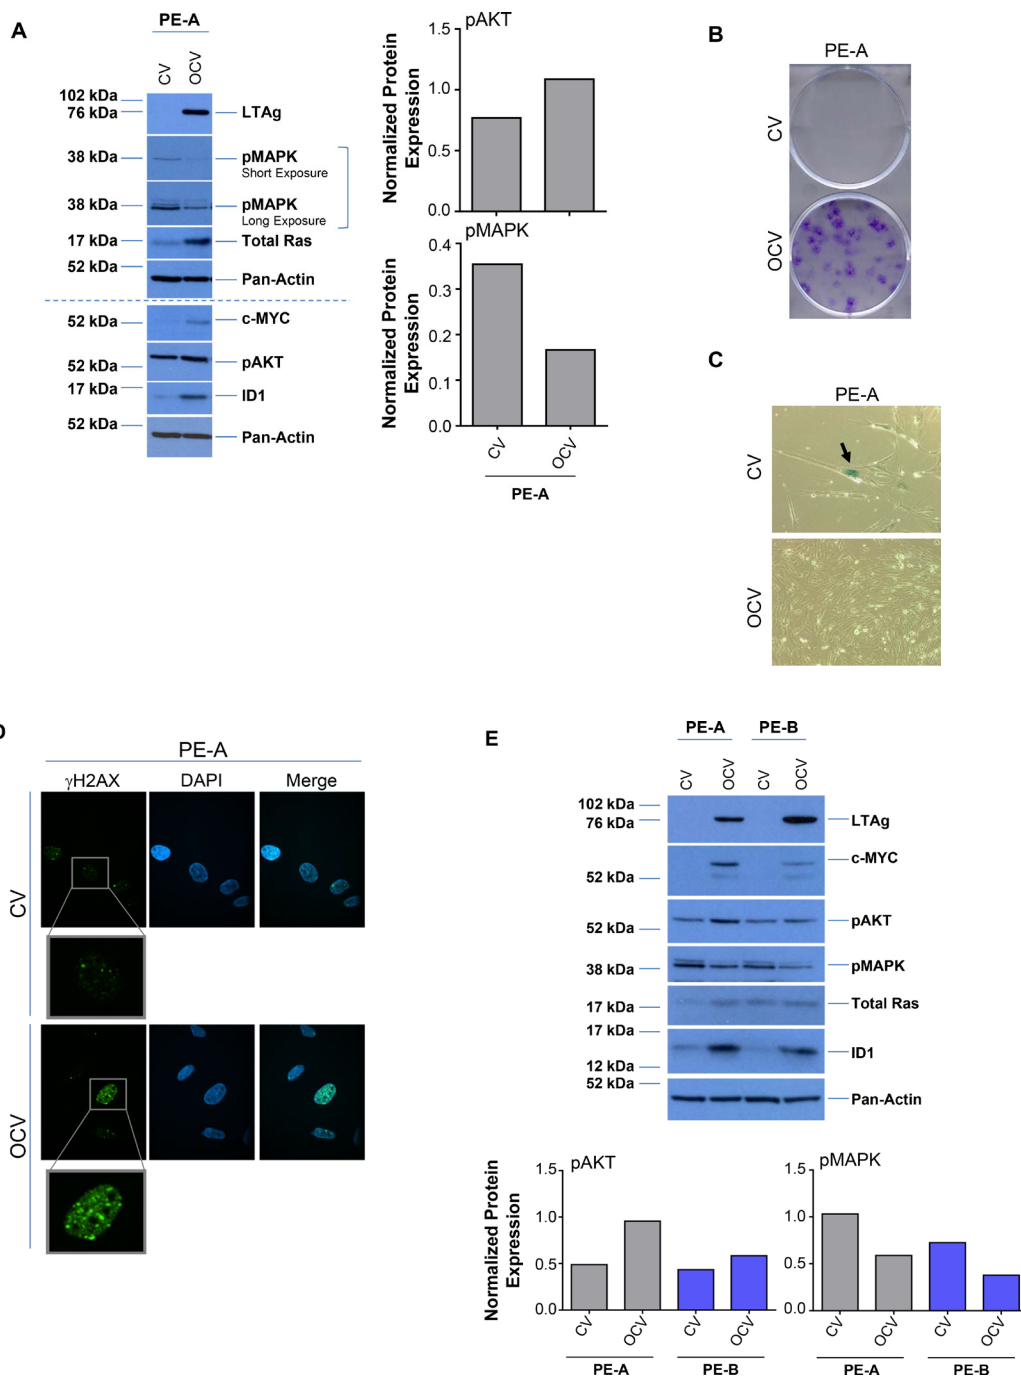

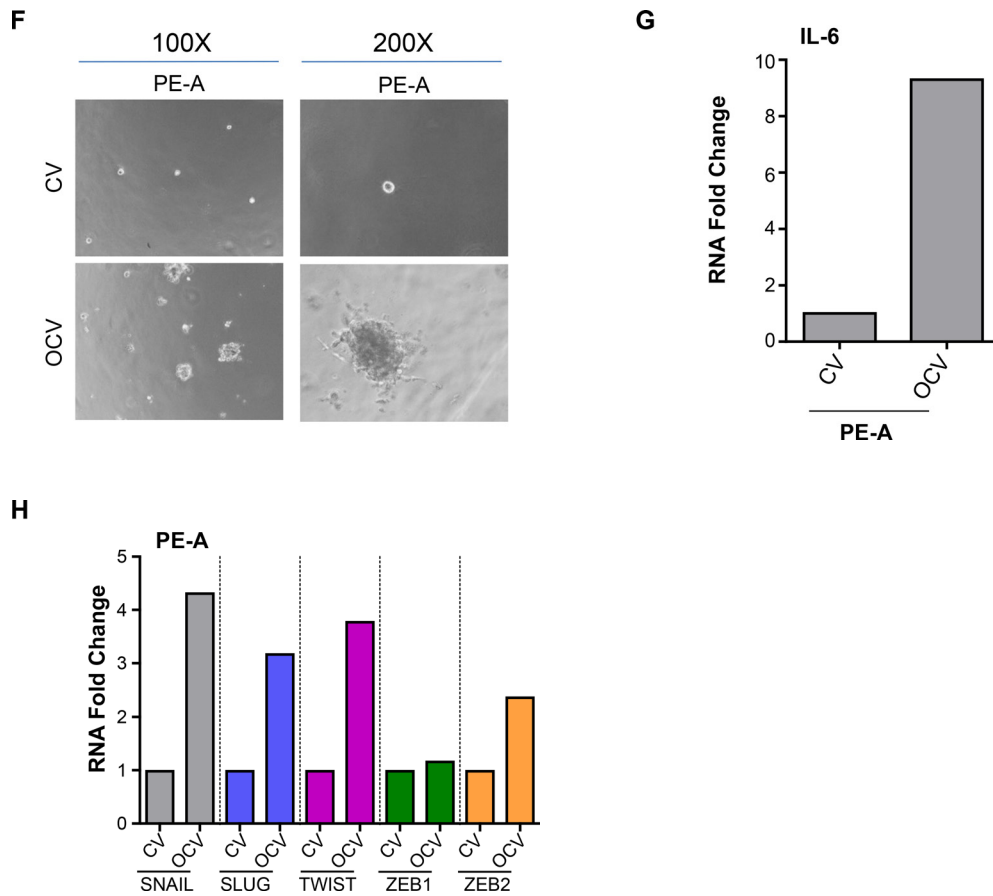

**Supplementary Figure 1: Cellular transformation of human primary endometriotic cells.** The first batch of retrovirally infected cells (PE-A-CV and PE-A-OCV) were utilized to: (A) obtain cell lysates for western blotting with the indicated antibodies (left panel). The dotted line specifies re-run samples to avoid the possibility of detecting overlapping bands of similar molecular weights. Densitometric analyses for pAKT and pMAPK are shown in the right panels; (B) perform colony formation assay and images were captured following 14 days in culture (representative images are shown, three independent experiments were conducted); (C) perform  $\beta$ -galactosidase staining and images were captured at 100X magnification (representative images are shown, three independent experiments were conducted); and (D) assess DNA damage via  $\gamma$ H2AX immunofluorescence staining (representative images shown were captured at 63 $\times$  magnification and the images of nuclei were enlarged and cropped using PowerPoint to focus on the DNA damage foci). The second batch of retrovirally infected cells (PE-A-CV and PE-B-CV as well as PE-A-OCV and PE-B-OCV) were utilized to: (E) obtain cell lysates for western blotting with the indicated antibodies (left panel). Densitometric analyses for pAKT and pMAPK are shown in the bottom panels; (F) assess the *in vitro* tumorigenic potential (by 3-dimensional morphogenesis assay). Representative images (from four independent experiments) were captured at 100 $\times$  (left) and 200X (right) magnification. The second batch of retrovirally infected cells (PE-A-CV and PE-A-OCV) were utilized to: (G) to measure IL-6 transcript levels via real-time PCR. Three independent experiments were performed; and (H) assess transcript levels for genes in the EMT pathway via real-time PCR (data shown are from one independent experiment (due to limiting cell numbers in PE-A-CV cells)).

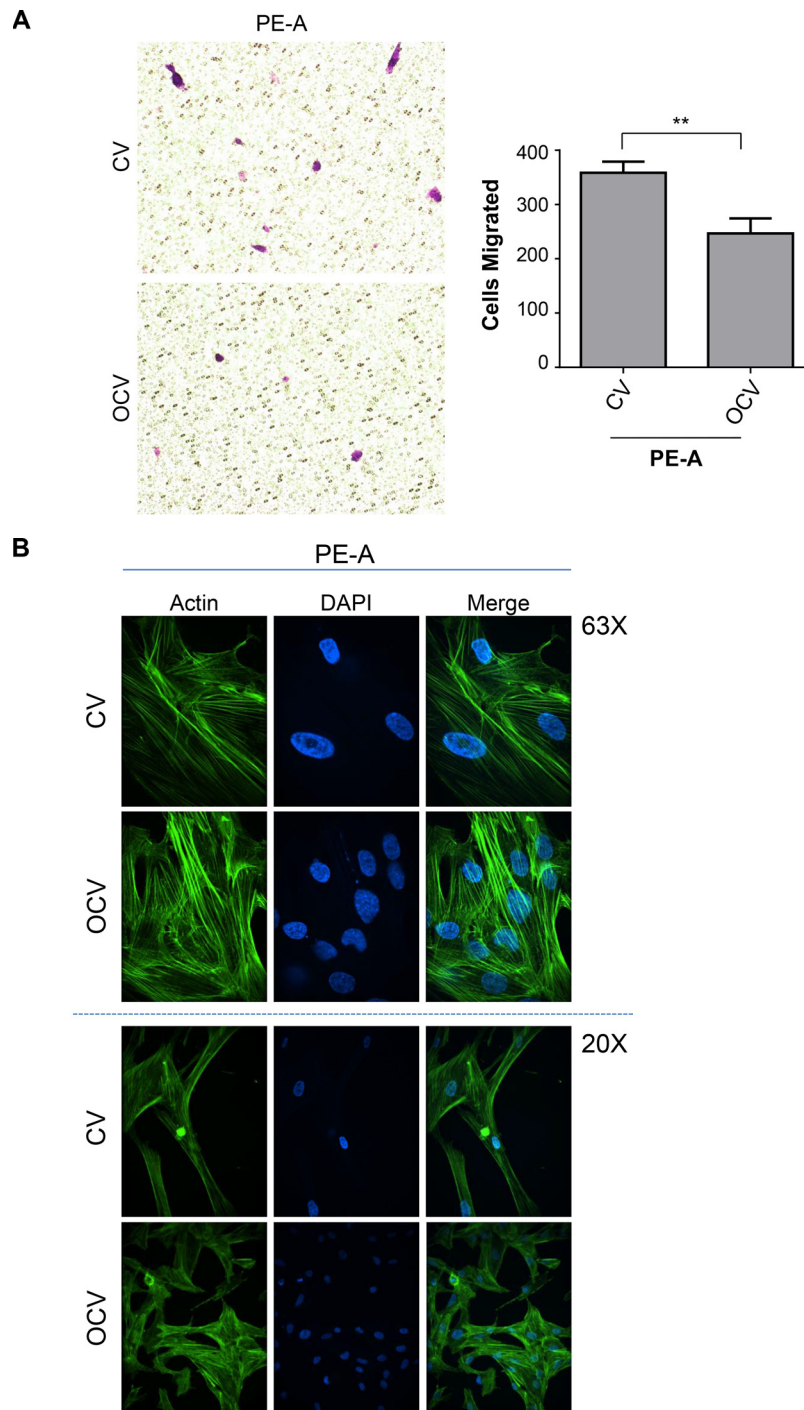

**Supplementary Figure 2: Conditioned media from senescent primary endometriotic cells promotes migration of transformed endometriotic cells.** The second batch of retrovirally infected cells (PE-A-CV and PE-A-OCV) were utilized to: (A) perform migration assay. Representative images (from four independent experiments) were captured at 100× magnification (left panel). Manual cell counts are presented in the right panel; and (B) assess actin filament organization using phalloidin staining. Representative images (from three independent experiments) are shown at 63X (top panel) and 20X (bottom panel) magnification.

**A**

|             |     |            |            |            |                         |            |                         |
|-------------|-----|------------|------------|------------|-------------------------|------------|-------------------------|
| NCOA4-Alpha | 1   | MNTFQDQSGS | SSNREPLLR  | SDARRDLELA | IGGVLRAEQQ              | IKDNLREVKA |                         |
| NCOA4-Beta  | 1   | MNTFQDQSGS | SSNREPLLR  | SDARRDLELA | IGGVLRAEQQ              | IKDNLREVKA |                         |
|             |     |            |            |            | <i>AR Binding Motif</i> |            | Oligomerization Domain  |
| NCOA4-Alpha | 51  | QIHSCISRHL | ECLRSREVL  | YEQVDLIYQL | KEETLQQQAQ              | QLYSLGQFN  |                         |
| NCOA4-Beta  | 51  | QIHSCISRHL | ECLRSREVL  | YEQVDLIYQL | KEETLQQQAQ              | QLYSLGQFN  |                         |
| NCOA4-Alpha | 101 | CLTHQLECTQ | NKDLANQSV  | CLERLGSLL  | KPEDSTVLLF              | EADTITLRQT |                         |
| NCOA4-Beta  | 101 | CLTHQLECTQ | NKDLANQSV  | CLERLGSLL  | KPEDSTVLLF              | EADTITLRQT |                         |
| NCOA4-Alpha | 151 | ITTFGSLKTI | QIPEHMAHA  | SSANIGPFLE | KRGCISMPEQ              | KSASGIVAVP |                         |
| NCOA4-Beta  | 151 | ITTFGSLKTI | QIPEHMAHA  | SSANIGPFLE | KRGCISMPEQ              | KSASGIVAVP |                         |
| NCOA4-Alpha | 201 | FSEWLLGSKP | ASGYQAPYIP | STDPQDWLTQ | KQTLNSQTS               | SRACNFFNNV |                         |
| NCOA4-Beta  | 201 | FSEWLLGSKP | ASGYQAPYIP | STDPQDWLTQ | KQTLNS---               | -----      | AhR interacting Domain  |
| NCOA4-Alpha | 251 | GGNLKLENW  | LLKSEKSSYQ | KCNSHSTSS  | FSIEMEKVGD              | QELPDQDEM  |                         |
| NCOA4-Beta  | 238 | -----      | -----      | -----      | -----                   | -----      |                         |
|             |     |            |            |            | <i>AR Binding Motif</i> |            |                         |
| NCOA4-Alpha | 301 | LSDWLVTPE  | SHKLRKPENG | SRETSEKFKL | LFQSYNVNDW              | LVKTDSCNTC |                         |
| NCOA4-Beta  | 238 | -----      | -----      | -----      | -----                   | -----      | Ferritin Binding Domain |
| NCOA4-Alpha | 351 | QGNQPKGVEI | ENLGNLCLN  | DHLEAKPLS  | TPSMVTEDWL              | VQNHQDPCKV |                         |
| NCOA4-Beta  | 238 | -----      | -----      | -----      | -----                   | -----      |                         |
| NCOA4-Alpha | 401 | EEVCRANEPC | TSFAECVCDE | NCEKEALYKW | LLKKEGKDKN              | GMPVEPKPEP |                         |
| NCOA4-Beta  | 238 | -----      | -----      | -----      | -----                   | -----      | AhR interacting Domain  |
| NCOA4-Alpha | 451 | EKHKDSLNMW | LCPRKEVIEQ | TKAPKAMTPS | RIADSFQVIK              | NSPLSEWLIR |                         |
| NCOA4-Beta  | 238 | -----      | -----      | -----      | -----                   | -----      |                         |
| NCOA4-Alpha | 501 | PPYKEGSPKE | VPGTEDRAGK | QKFKSPMNTS | WCSFNTADWV              | LPGKKMGNLS |                         |
| NCOA4-Beta  | 238 | -----      | -----      | -----      | -----                   | -----      |                         |
| NCOA4-Alpha | 551 | QLSSGDKWL  | LRKKAQEVLL | NSPLQEEHNF | PPDHYGLPAV              | CDLFACMQLK |                         |
| NCOA4-Beta  | 238 | -----      | -----QEVLL | NSPLQEEHNF | PPDHYGLPAV              | CDLFACMQLK |                         |
| NCOA4-Alpha | 601 | VDKEKWLYRT | PLQM       |            |                         |            |                         |
| NCOA4-Beta  | 273 | VDKEKWLYRT | PLQM       |            |                         |            |                         |

**B**

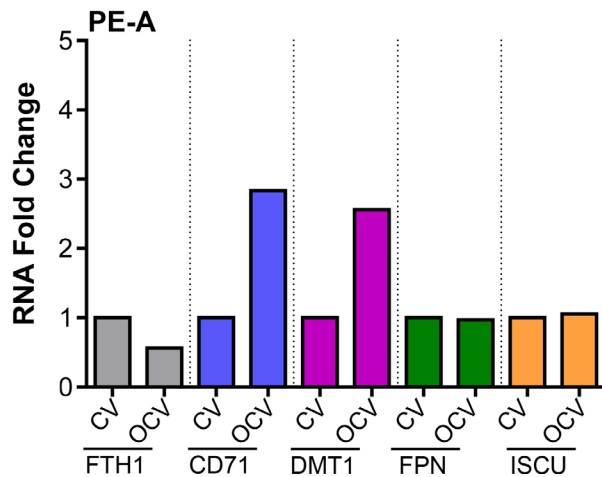

**C**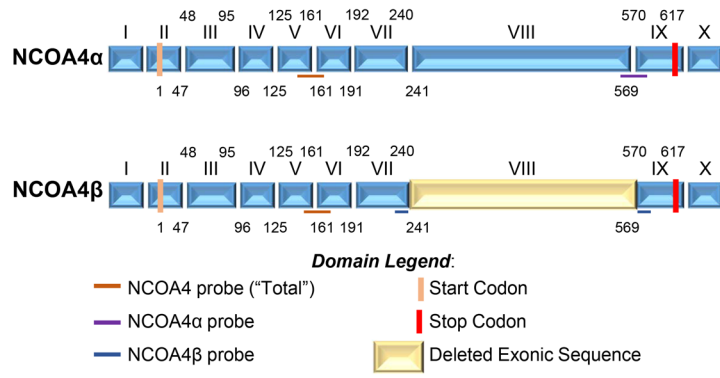**D**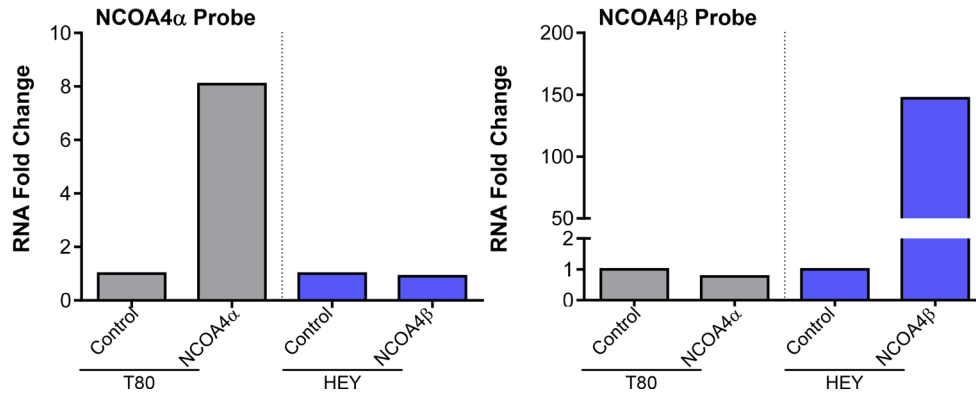**E**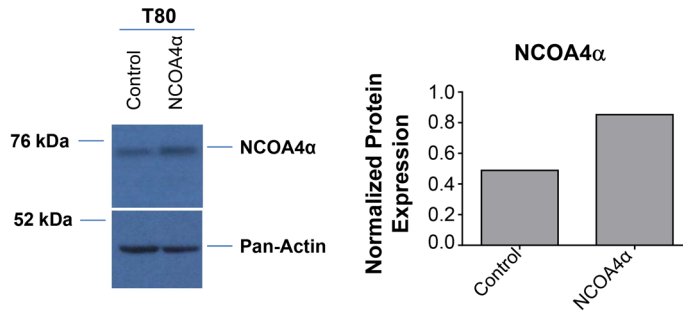**F**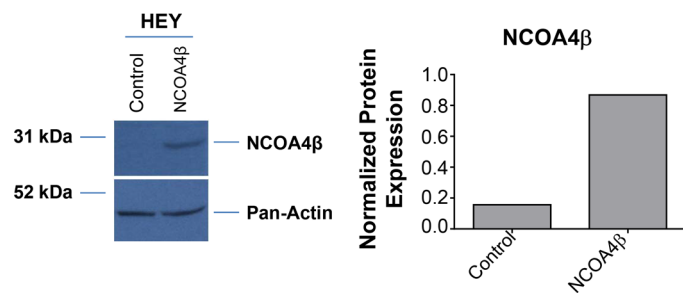

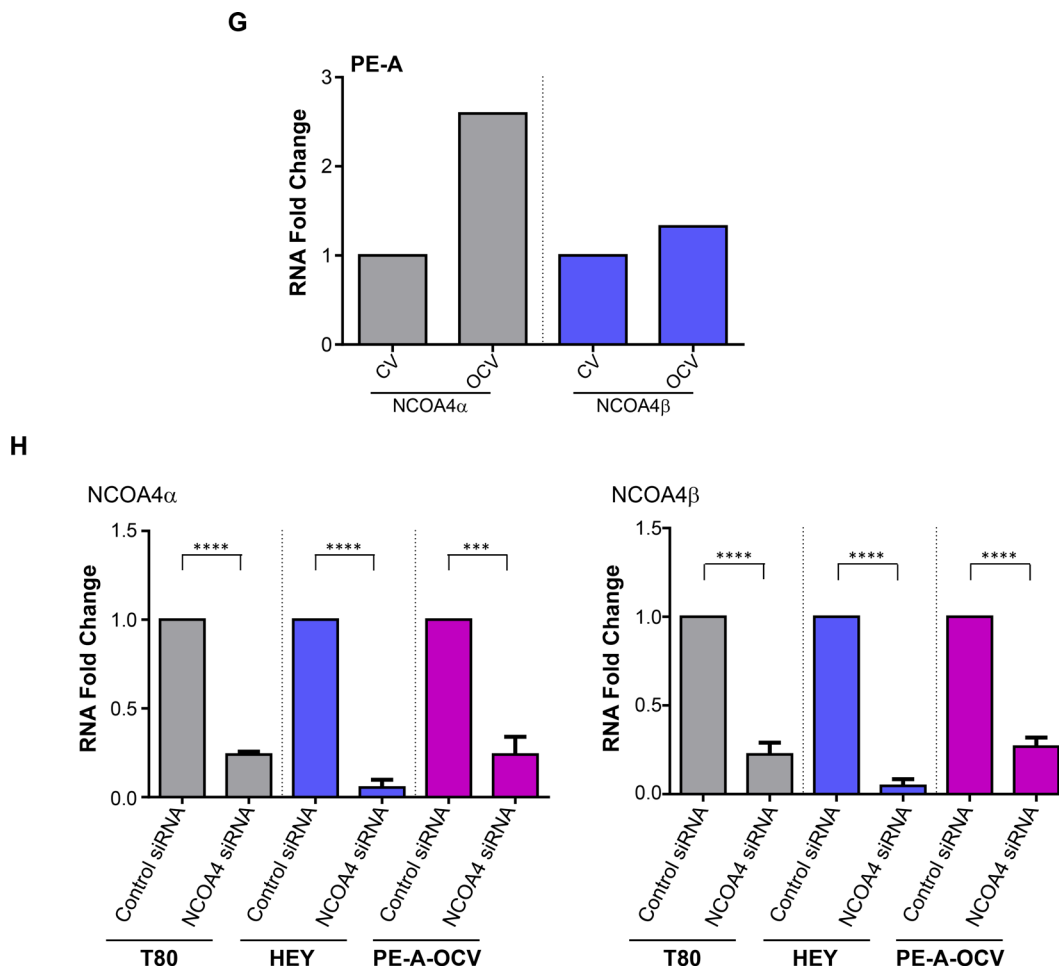

**Supplementary Figure 3: Validation of real-time PCR probes/primers for NCOA4 isoforms and their increased transcript expression in transformed endometriotic cells.** (A) Using DiAlign software (Genomatix), the protein sequence from our NCOA4 $\beta$  clone was aligned with NCOA4 $\alpha$  (accession #: Q13772). Dashes represent internally deleted sequence in the NCOA4 $\beta$  variant while highlighted regions represent defined binding domains (i.e., oligomerization domain (amino acid 17 to 125), two AhR interaction domains (amino acids 235 to 321 and amino acids 441 to 556), ferritin binding domain (amino acids 383 to 522), and two androgen receptor binding motifs (amino acids 92 to 328)). (B) Using RNA extracted from the second batch of PE-A-CV and PE-A-OCV cells, transcript levels for genes in the iron pathway were assessed via real-time PCR. Data shown are from one independent experiment (due to limiting cell numbers in PE-A-CV cells). (C) The location of the probes to detect total NCOA4 (Assays-on-Demand) and NCOA4 $\alpha$  and NCOA4 $\beta$  (Assays-by-Design) are shown. (D) RNA isolated from NCOA4 $\alpha$  overexpressing T80 and NCOA4 $\beta$  overexpressing HEY cells was utilized to validate the available NCOA4 probe/primer sets. (E) Cell lysates from control and NCOA4 $\alpha$  overexpressing T80 cells were analyzed by western blotting with the indicated antibodies (left panel). Densitometric analysis is presented (right panel). (F) Cell lysates from control and NCOA4 $\beta$  overexpressing HEY cells were analyzed by western blotting with the indicated antibodies (left panel). Densitometric analysis for NCOA4 $\beta$  is presented (right panel). (G) RNA from the second batch of PE-A-CV and PE-A-OCV cells was utilized to assess transcript levels of NCOA4 $\alpha$  and NCOA4 $\beta$  via real-time PCR. Data shown are from one independent experiment (due to limiting cell numbers in PE-A-CV cells). (H) T80, HEY, and second batch of PE-A-OCV cells were treated with control or NCOA4 siRNA. Isolated RNA was utilized to assess transcript levels of NCOA4 $\alpha$  and NCOA4 $\beta$  via real-time PCR. Three independent experiments were performed.
